# Supplementary material for: Comparison of the novel WEst coast System for Triage (WEST) with Rapid Emergency Triage and Treatment System (RETTS©): an observational pilot study
Source: Springer Nature journal article supplement (doi:10.1186/s12245-022-00452-2), 2022-09-12
Supplement: MOESM1 [file 23478288]

## RÖD VARNINGSSYMTOM

| BLÖDNING/ANEMI                                                                                 | DYSPPNE                                                                         | INFektion / FEBER                                                                                  |                                        |
|------------------------------------------------------------------------------------------------|---------------------------------------------------------------------------------|----------------------------------------------------------------------------------------------------|----------------------------------------|
| Blödning, stor och okontrollerad                                                               | Dyspné med gurglande, skummande andning                                         | Infektion, misstänkt + NEWS2 ≥7                                                                    |                                        |
| Hematemes / pågående melena med puls >120                                                      | Dyspné, kraftig med ST-höjning/ nytillkommet grenblock                          | Infektion med feber, påverkad och nackstelhet/ meningism/peteccier                                 |                                        |
| BRÖSTSMÄRTA                                                                                    |                                                                                 | MEDVETANDEPÅVERKAN                                                                                 |                                        |
| Bröstmärta med ST-höjning/ nytillkommet grenblock                                              | GRAVIDITET / POST PARTUM                                                        |                                                                                                    | Medvetslös                             |
| Bröstmärta med svimning eller pågående vegetativa symtom                                       | Gravid >v12 med kraftig vaginalblödning (blödning genom 2 bindor/h i mer än 2h) | NEURO / STROKE                                                                                     |                                        |
| BUK/RECT/SCROTUM/LJUMSKE                                                                       |                                                                                 | Stroke med symtom <6h och modifNIHSS ≥2p                                                           |                                        |
| Buksmärta, plötsligt påkommen, svår (nivå 3) och konstant med SBT < 90 och/eller puls >120     | Gravid med pågående eller genomgången krampanfall (tom 2v efter födsel)         | Yrsel akut påkommen med symtom <6h och modifNIHSS ≥2p                                              |                                        |
|                                                                                                | Gravid >v20 med snabbt insättande starka buksmärter                             | Kramper pågående                                                                                   |                                        |
| DIABETES                                                                                       |                                                                                 | OSPECIFIK SJUKDOM                                                                                  |                                        |
| Hypoglykemi Glc <3                                                                             | HJÄRTSTOPP / LUFTVÄGSHINDER                                                     |                                                                                                    | Kalium >6,5 + EKG-förändringar         |
|                                                                                                | Hjärtstopp; pågående/åtgärdat                                                   |                                                                                                    |                                        |
|                                                                                                | Luftväg; stridor, hotad eller ofri luftväg, intub/larynxmask                    |                                                                                                    |                                        |
| TRAUMA                                                                                         |                                                                                 | TRAUMA                                                                                             |                                        |
| Tramalarm Nivå 1                                                                               |                                                                                 | Tramalarm Nivå 2                                                                                   |                                        |
| Andning                                                                                        | Skademekanism                                                                   | Buktrauma med tilltagande smärta/omfång, urostopp eller hematuri                                   |                                        |
| • Behov av ventilationsstöd                                                                    | • Bilolycka > 50 km/h utan bilbälte                                             | Drunkning/dykolycka                                                                                |                                        |
| • AF < 10 eller > 29                                                                           | • Utkastad ur fordon                                                            | Elolycka högspringning / blix                                                                      |                                        |
| Cirkulation                                                                                    | • Fastklämd med losstagning > 20 min                                            | Fraktur med misstänkt kärlskada (nedsatt cirkulation distalt, blek och kall extremitet), nervskada |                                        |
| • BT < 90 eller ej palpabel radialis puls                                                      | • MC-olycka (eller motsvarande) > 35 km/h                                       | Hängning/strykning                                                                                 |                                        |
| Neurologi                                                                                      | • Fall > 5 m                                                                    | Kemolycka / strålskada                                                                             |                                        |
| • RLS ≥ 3 eller GCS ≤ 13*                                                                      | Tramalarm Nivå 3                                                                |                                                                                                    | Ögonskada; penetrerande eller frätande |
| Skademekanism                                                                                  | Skademekanism                                                                   |                                                                                                    |                                        |
| • Penetrerande våld mot huvud, hals, bål, extremiteter ovan armbåge/knä (inte ytliga skärsår)* | • Fall >3m                                                                      |                                                                                                    |                                        |
| • Öppen skallskada/impressionsfraktur*                                                         | • Trafikolycka med misstanke om högenergivåld                                   |                                                                                                    |                                        |
| • Ansikts-/halskada med hotad luftväg                                                          | • MC/Mopen >30km/h                                                              |                                                                                                    |                                        |
| • Instabil/deformerad bröstorg*                                                                | • Hästolyckor                                                                   |                                                                                                    |                                        |
| • Svår smärta i bäckenet (misstänkt bäckenfraktur)*                                            | • Oskyddade trafikanter                                                         |                                                                                                    |                                        |
| • Misstänkt ryggmärgsskada*                                                                    |                                                                                 |                                                                                                    |                                        |
| • ≥ 2 frakturer på långa rörben                                                                |                                                                                 |                                                                                                    |                                        |
| • Amputation ovan hand/fot*                                                                    |                                                                                 |                                                                                                    |                                        |
| • Stor yttre blödning                                                                          |                                                                                 |                                                                                                    |                                        |
| • Brännskada ≥ 18 % eller inhalationsskada*                                                    |                                                                                 |                                                                                                    |                                        |

## ORANGE VARNINGSSYMTOM

| ALLERGI                                                                 | EXTREMITETSPROBLEM                                                                    | NEURO / STROKE                                                                         |                                    |
|-------------------------------------------------------------------------|---------------------------------------------------------------------------------------|----------------------------------------------------------------------------------------|------------------------------------|
| Allergi, akut och potentiellt allvarlig                                 | Akut ischemi (blek och kall extremitet)                                               | Stroke med symtom 6-24h och modifNIHSS ≥2p                                             |                                    |
| BLÖDNING/ANEMI                                                          |                                                                                       | GRAVIDITET / POST PARTUM                                                               |                                    |
| Hematemes / pågående melena                                             | Gravid med något måttlig vaginalblödning (mer än kraftig mens)                        | Yrsel akut påkommen med symtom 6-24h och modifNIHSS ≥2p                                |                                    |
| Bakre näsblödning / postop tonsillblödning                              | Gravid med kraftig buksmärta, ihållande eller intervallsmärta                         | OSPECIFIK SJUKDOM                                                                      |                                    |
| Riklig vaginalblödning (blödning genom 2 bindor/h i mer än 2h)          | Gravid >v20 + huvudvärk / buksmärta / bröstsmärta/kräkning + BT >140/90 (preeklampsi) | Känd addison eller binjurebarkssvikt                                                   |                                    |
| BRÖSTSMÄRTA                                                             |                                                                                       | RYGGSMÄRTA                                                                             |                                    |
| Bröstmärta med nytillkomna EKG-förändring                               | Gravid >v20 med trauma mot buk                                                        | Ryggsmärta med nytillkommen ridbyxanestesi eller inkontinens                           |                                    |
| Bröstmärta, pågående med misstanke om AKS eller annan allvarlig orsak   | Post-partum (inom 14 d) med feber >38                                                 | SVIMNING                                                                               |                                    |
| BUK/RECT/SCROTUM/LJUMSKE                                                |                                                                                       | HJÄRTRYTM                                                                              |                                    |
| Buksmärta, plötsligt påkommen och svår (nivå 3) eller vegetativa symtom | Tackycardi, breddökad (som orsak till vårdtillfället)                                 | TRAUMA                                                                                 |                                    |
| Scrotumsmärta, hastigt påkommande, kraftig och ihållande                | HUVUDVÄRK                                                                             |                                                                                        | Thoraxtrauma med vegetativa symtom |
|                                                                         | Huvudvärk, urakut debut och intensiv                                                  | Brännskada/frätskada 5-18% eller cirkumferent                                          |                                    |
| DIABETES                                                                |                                                                                       | INFektion / FEBER                                                                      |                                    |
| Hyperglykemi, B-Glc >11 + AF ≥v22 eller metabol acidosis                | Infektion, misstänkt samt NEWS2 5-6                                                   | Fraktur ; öppen, felställd, eller höftnära                                             |                                    |
|                                                                         | Infektion, misstänkt med pågående cytostatikabehandling / immunosupprimerad           | Ledluxation (ej fingrar/tår), protesluxation eller luxationsfraktur                    |                                    |
| DYSPPNE                                                                 |                                                                                       | INTOX                                                                                  |                                    |
| Dyspné, akut svår/synligt ansträngd andning/cyanos/utmattad patient     | Intox, akut och allvarlig eller suicidal                                              | Skalltrauma med:                                                                       |                                    |
| Dyspné, nytillkommen med nytillkomna EKG-förändringar                   | MEDVETANDEPÅVERKAN                                                                    |                                                                                        | GCS 14                             |
|                                                                         | Medvetandesänkt nytillkommet                                                          | GCS 15 och 1 av: Blödningsrisk (Waran/NOAK, dubbel trombocythämning eller blödersjuka) |                                    |
|                                                                         |                                                                                       | krampanfall, neurologiska avvikelser, shuntbehandling                                  |                                    |
|                                                                         |                                                                                       | Symtomgivande rökinalation                                                             |                                    |

## GUL VARNINGSSYMTOM

| BLÖDNING/ANEMI                                                                           | DIARRE/KRÄKNING                                                           | TRAUMA                                                                  |  |
|------------------------------------------------------------------------------------------|---------------------------------------------------------------------------|-------------------------------------------------------------------------|--|
| Blödning; stor men kontrollerad                                                          | Kräkningar, pågående                                                      | Fraktur, stark misstanke och aktuellt (72h) skadetillfälle              |  |
| Anemi, Hb <70 utan pågående blödning                                                     | EXTREMITETSPROBLEM                                                        |                                                                         |  |
| BRÖSTSMÄRTA                                                                              |                                                                           | Ledluxation fingrar och tår                                             |  |
| Bröstmärta, pågående men med låg misstanke allvarlig orsak och utan tydlig palpömheter   | Extremitetssmärta/-svullnad med nytillkommen dyspné                       | Nackskada med palpömheter i medellinjen                                 |  |
| Bröstmärta senaste 24h, ej pågående men med misstanke om AKS eller annan allvarlig orsak | Intraartikulär svullen, rodnad led (en led) med feber/misstänkt infektion | Skada med oproportionerlig smärtnivå                                    |  |
| Bröstmärta, andningskorrelerad med misstanke om allvarlig orsak                          | NEURO / STROKE                                                            |                                                                         |  |
|                                                                                          | TIA senaste 24h – nu symtomfri                                            | Skalltrauma, GCS 15; varit avsvimnad, amnesi eller upprepade kräkningar |  |
|                                                                                          |                                                                           | URINVÄGSBESVÄR                                                          |  |
|                                                                                          |                                                                           | Urostopp                                                                |  |

## GUL BEHOV/PROCESS

| SANNOLIKT SLUTENVÅRDSBEHOV | SKÖR ÄLDRE               | YTTRE VÅLD                      |
|----------------------------|--------------------------|---------------------------------|
| Sannolikt slutenvårdsbehov | Skör äldre enl screening | Sexuella övergrepp, misstanke   |
|                            |                          | Våld i nära relation, misstanke |

## INGET VARNINGSSYMTOM FINNS

PATIENT-ID

ED1/ED2/ED3/AMB

DATE/TIME:

| RR:                |     | Physiological parameter        | 3     | 2      | 1         | Score 0             | 1               | 2               | 3             |
|--------------------|-----|--------------------------------|-------|--------|-----------|---------------------|-----------------|-----------------|---------------|
| SAT:               |     | Respiration rate (per minute)  | ≤8    |        | 9-11      | 12-20               |                 | 21-24           | ≥25           |
| BP:                |     | SpO <sub>2</sub> Scale 1 (%)   | ≤91   | 92-93  | 94-95     | ≥96                 |                 |                 |               |
| HR:                |     | SpO <sub>2</sub> Scale 2 (%)   | ≤83   | 84-85  | 86-87     | 88-92<br>≥93 on air | 93-94 on oxygen | 95-96 on oxygen | ≥97 on oxygen |
| Temp:              |     | Air or oxygen?                 |       | Oxygen |           | Air                 |                 |                 |               |
| RLS/GCS:           |     | Systolic blood pressure (mmHg) | ≤90   | 91-100 | 101-110   | 111-219             |                 |                 | ≥220          |
| Known resp-insuff. | YES | Pulse (per minute)             | ≤40   |        | 41-50     | 51-90               | 91-110          | 111-130         | ≥131          |
| Oxygen             | YES | Consciousness                  |       |        |           | Alert               |                 |                 | CVPU          |
|                    |     | Temperature (°C)               | ≤35.0 |        | 35.1-36.0 | 36.1-38.0           | 38.1-39.0       | ≥39.1           |               |

RETTS chief complaint /ESS nr:

|                 |     |        |        |       |      |
|-----------------|-----|--------|--------|-------|------|
| RETTS ESS color | RED | ORANGE | YELLOW | GREEN | BLUE |
| RETTS prio      | RED | ORANGE | YELLOW | GREEN | BLUE |

|                                        |          |             |                                |          |
|----------------------------------------|----------|-------------|--------------------------------|----------|
| WEST warning signs and symptom         | RED      | ORANGE      | YELLOW                         |          |
| Color according to NEWS 2 Medical risk | >7p High | 5-6P Medium | single parameter 3p Low-medium | 0-4p Low |

|                     |     |        |        |       |      |
|---------------------|-----|--------|--------|-------|------|
| Clinical judgement  | RED | ORANGE | YELLOW | GREEN | BLUE |
| WEST prioritization | RED | ORANGE | YELLOW | GREEN | BLUE |

Comments:

Signature:
