# Supplementary material for: Comparison of the novel WEst coast System for Triage (WEST) with Rapid Emergency Triage and Treatment System (RETTS©): an observational pilot study
Source: Springer Nature journal article supplement (doi:10.1186/s12245-022-00452-2), 2022-09-12
Supplement: MOESM2 [file 23478288]

Method:  
1510 ED patient triaged with both triaging system

## Results and conclusions

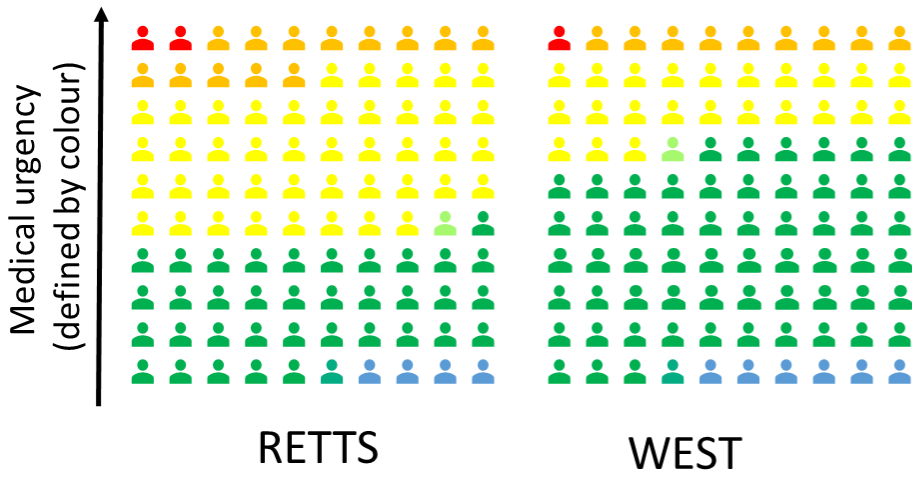

WEST may reduce  
overprioritization
